# Supplementary material for: Red Meat Intake, Indole-3-Acetate, and Dorea longicatena Together Affect Insulin Resistance after Gastric Bypass
Source: MDPI journal article supplement (doi:10.3390/nu15051185), 2023-02-27
Supplement: s1 [file s1]

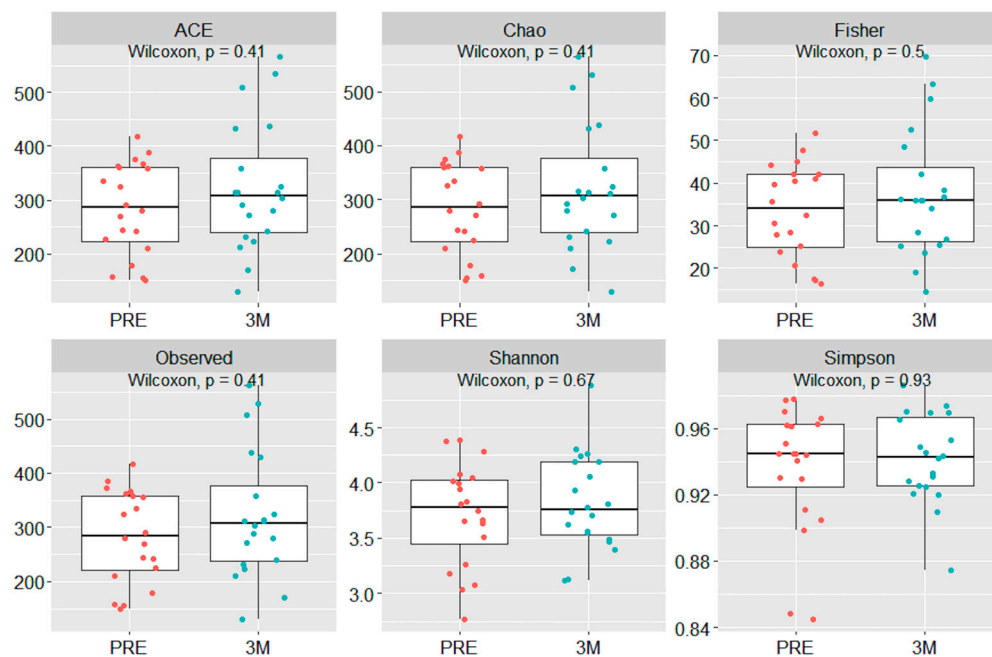

**Supplementary Figure S1.** Alpha diversity indices before and three months after RYGB. Statistical significance  $p < 0.05$ .

Supplementary Table S1 - Regression models for effects of variation ( $\Delta$  postoperative – preoperative) of food intake, tryptophan metabolites and gut microbiota (independent variables) on postoperative Glycemia, HbA1c, HOMA-IR and HOMA-Beta (dependent variables).

| Food intake                  | Glycemia                 |        | HbA1c                     |        | HOMA-IR                  |           | HOMA-Beta               |       |
|------------------------------|--------------------------|--------|---------------------------|--------|--------------------------|-----------|-------------------------|-------|
| Model 1                      | $\beta$ (95% CI)         | p      | $\beta$ (95% CI)          | p      | $\beta$ (95% CI)         | p         | $\beta$ (95% CI)        | p     |
| Protein (g)                  | -0.02 (-0.98;0.93)       | 0.97   | 0.01(-0.01, 0.03)         | 0.57   | -0.01(-0.07, 0.04)       | 0.69      | -1.02 (-2.98, 0.95)     | 0.41  |
| Tryptophan (mg)              | -0.02 (-0.10;0.06)       | 0.74   | 0.0002(-0.001, 0.002)     | 0.88   | 0.001(-0.004, 0.01)      | 0.85      | 0.02 (-0.16, 0.20)      | 0.86  |
| Fiber (g)                    | 1.28 (-0.47;3.03)        | 0.25   | -0.01 (-0.04, 0.03)       | 0.77   | 0.03(-0.08, 0.14)        | 0.64      | -0.25 (-4.45, 3.95)     | 0.93  |
| Red meat (g)                 | 0.10 (0.03;0.17)         | 0.03** | 0.0002(-0.001, 0.002)     | 0.81   | 0.01(0.005, 0.01)        | 0.002***  | -0.03 (-0.20, 0.13)     | 0.75  |
| Refined cereals (g)          | 0.001 (-0.03; 0.03)      | 0.96   | -0.0002 (-0.001, 0.0005)  | 0.60   | 0.0004(-0.001, 0.002)    | 0.72      | -0.004 (-0.07, 0.07)    | 0.94  |
| <b>Model 2</b>               |                          |        |                           |        |                          |           |                         |       |
| Protein (g)                  | -0.17 (1.23;0.89)        | 0.80   | 0.005 (-0.02, 0.03)       | 0.79   | -0.05(-0.09, -0.02)      | 0.03**    | -1.72 (-4.60, 1.17)     | 0.35  |
| Tryptophan (mg)              | -0.05 (-0.13;0.04)       | 0.39   | 0.0001 (-0.002, 0.002)    | 0.93   |                          |           | 0.10 (-0.17, 0.37)      | 0.57  |
| Fiber (g)                    | 1.53 (-0.48;3.53)        | 0.24   | -0.004(-0.06, 0.05)       | 0.90   |                          |           | -2.71(-9.35, 3.94)      | 0.52  |
| Red meat (g)                 | 0.10 (0.03;0.18)         | 0.05** | 0.0001(-0.002, 0.002)     | 0.96   | 0.01 (0.01, 0.01)        | 0.0001*** | 0.03 (-0.18, 0.23)      | 0.85  |
| Refined cereals (g)          | -0.003 (-0.03; 0.03)     | 0.88   | -0.0002(-0.001, 0.001)    | 0.72   |                          |           | -0.01 (-0.09, 0.07)     | 0.81  |
| <b>Metabolites</b>           |                          |        |                           |        |                          |           |                         |       |
| <b>Model 1</b>               |                          |        |                           |        |                          |           |                         |       |
| Tryptophan                   | -0.001 (-0.002, 0.0002)  | 0.19   | 0.0000(-0.0000, 0.0000)   | 0.92   | -0.0000(-0.0001, 0.0000) | 0.52      | 0.002 (0.0003, 0.004)   | 0.09* |
| N-acetyl-serotonin           | -0.0000 (-0.001, 0.001)  | 0.94   | 0.0000(-0.0000, 0.0000)   | 0.35   | -0.0000(-0.0001, 0.0000) | 0.27      | -0.001(-0.002, 0.001)   | 0.32  |
| Indole-3-acetate             | 0.003 (-0.01, 0.01)      | 0.58   | 0.0001(-0.0001, 0.0003)   | 0.38   | -0.001(-0.002, 0.0002)   | 0.21      | -0.01(-0.05, 0.02)      | 0.57  |
| Glutamic acid                | -0.002 (-0.01, 0.003)    | 0.49   | -0.0001(-0.0002, 0.0000)  | 0.32   | 0.0002(-0.0001, 0.001)   | 0.34      | 0.01(-0.002, 0.02)      | 0.18  |
| L-alanine                    | 0.0001 (-0.0002, 0.0004) | 0.52   | -0.0000(-0.0000, 0.0000)  | 0.15   | 0.0000(-0.0000, 0.0000)  | 0.28      | 0.0001 (-0.0005, 0.001) | 0.75  |
| $\alpha$ -ketoglutarate acid | -0.01 (-0.04, 0.03)      | 0.69   | -0.0004(-0.001, 0.0002)   | 0.28   | -0.0004(-0.002, 0.002)   | 0.78      | -0.01 (-0.09, 0.06)     | 0.77  |
| Benzoic acid                 | -0.004 (-0.01, 0.003)    | 0.39   | -0.0002(-0.0003, -0.0001) | 0.04** | -0.0002(-0.001, 0.0002)  | 0.35      | 0.001 (-0.01, 0.02)     | 0.91  |
| Anthranilic acid             | 0.002 (-0.001, 0.01)     | 0.22   | -0.0000(-0.0001, 0.0000)  | 0.61   | 0.0002 (0.0000, 0.0004)  | 0.10*     | 0.001 (-0.01, 0.01)     | 0.76  |

Continue on the next page

| Metabolites                         | Glycemia                 |        | HbA1c                     |      | HOMA-IR                   |      | HOMA-Beta               |      |
|-------------------------------------|--------------------------|--------|---------------------------|------|---------------------------|------|-------------------------|------|
| Model 2                             | $\beta$ (95% CI)         | p      | $\beta$ (95% CI)          | p    | $\beta$ (95% CI)          | p    | $\beta$ (95% CI)        | p    |
| Tryptophan                          | -0.001 (-0.002, -0.0004) | 0.06*  | 0.0000 (-0.0000, 0.0000)  | 0.52 | -0.0000 (-0.0001, 0.0001) | 0.63 | 0.003 (-0.0004, 0.01)   | 0.20 |
| N-acetyl-serotonin                  | 0.001 (-0.0003, 0.001)   | 0.32   | -0.0000 (-0.0000, 0.0000) | 0.81 | -0.0000 (-0.0001, 0.0000) | 0.81 | -0.001 (-0.003, 0.001)  | 0.41 |
| Indole-3-acetate                    |                          |        | 0.0002 (-0.0001, 0.0004)  | 0.28 | -0.001 (-0.002, 0.0004)   | 0.34 | 0.01 (-0.03, 0.05)      | 0.74 |
| Glutamic acid                       | 0.01 (-0.002, 0.02)      | 0.22   | -0.0000 (-0.0002, 0.0001) | 0.62 | 0.0003 (-0.0003, 0.001)   | 0.48 | 0.01 (-0.01, 0.03)      | 0.58 |
| L-alanine                           | 0.0003 (0.0000, 0.001)   | 0.13   | -0.0000 (-0.0000, 0.0000) | 0.35 | 0.0000 (-0.0000, 0.0000)  | 0.52 | -0.0001 (-0.001, 0.001) | 0.81 |
| $\alpha$ -ketoglutarate acid        |                          |        | -0.0002 (-0.001, 0.001)   | 0.70 | -0.001 (-0.004, 0.002)    | 0.69 | -0.05 (-0.17, 0.07)     | 0.55 |
| Benzoic acid                        | -0.01 (-0.01, 0.0003)    | 0.17   | -0.0001 (-0.0003, 0.0001) | 0.37 | -0.0004 (-0.001, 0.0002)  | 0.29 | -0.002 (-0.02, 0.02)    | 0.90 |
| Anthranilic acid                    |                          |        | 0.0000 (-0.0001, 0.0001)  | 0.61 | 0.0001 (-0.0002, 0.0004)  | 0.74 | 0.004 (-0.01, 0.02)     | 0.61 |
| <b>Gut Microbiota</b>               |                          |        |                           |      |                           |      |                         |      |
| <b>Model 1</b>                      |                          |        |                           |      |                           |      |                         |      |
| Akkermansia muciniphila (sq15)      | -0.0003 (-0.001, 0.001)  | 0.58   | -0.0000 (-0.0000, 0.0000) | 0.40 | 0.0000 (-0.0000, 0.0001)  | 0.49 | 0.001 (-0.001, 0.003)   | 0.55 |
| Clostridium tartaricellae (sq338)   | -0.004 (-0.04, 0.03)     | 0.86   | -0.0002 (-0.001, 0.0005)  | 0.63 | -0.001 (-0.002, 0.001)    | 0.57 | -0.05 (-0.12, 0.01)     | 0.20 |
| Fusobacterium nucleatum (sq381)     | 0.09 (0.02, 0.16)        | 0.05** | 0.001 (-0.0004, 0.003)    | 0.23 | 0.002 (-0.01, 0.01)       | 0.68 | 0.18 (-0.17, 0.53)      | 0.41 |
| Fusobacterium periodonticum (sq368) | -0.004 (-0.05, 0.04)     | 0.91   | 0.0001 (-0.001, 0.001)    | 0.87 | -0.001 (-0.003, 0.002)    | 0.63 | -0.02 (-0.12, 0.08)     | 0.70 |
| Gemella haemolysans (sq311)         | -0.01 (-0.05, 0.03)      | 0.67   | 0.0004 (-0.0005, 0.001)   | 0.48 | -0.001 (-0.003, 0.002)    | 0.56 | 0.04 (-0.06, 0.13)      | 0.52 |
| Streptococcus salivarius (sq28)     | 0.001 (-0.0005, 0.003)   | 0.25   | 0.0000 (0.0000, 0.0001)   | 0.12 | -0.0001 (-0.0004, 0.0002) | 0.51 | -0.002 (-0.01, 0.01)    | 0.80 |
| Blautia luti (sq96)                 | 0.001 (-0.01, 0.01)      | 0.94   | 0.0000 (-0.0002, 0.0003)  | 0.77 | -0.0001 (-0.001, 0.001)   | 0.80 | -0.001 (-0.03, 0.02)    | 0.98 |

Continue on the next page

| Gut Microbiota                       | Glycemia               |       | HbA1c                   |      | HOMA-IR                  |       | HOMA-Beta             |       |
|--------------------------------------|------------------------|-------|-------------------------|------|--------------------------|-------|-----------------------|-------|
| Model 1                              | $\beta$ (95% CI)       | p     | $\beta$ (95% CI)        | p    | $\beta$ (95% CI)         | p     | $\beta$ (95% CI)      | p     |
| Clostridium clostridioforme (sq691)  | -0.1 (-0.4, 0.2)       | 0.60  | -0.01 (-0.01, -0.000)   | 0.20 | -0.01 (-0.02, 0.01)      | 0.40  | -0.4 (-0.9, 0.2)      | 0.40  |
| Clostridium lavalense (sq380)        | 0.01 (-0.05, 0.1)      | 0.90  | 0.001 (-0.001, 0.002)   | 0.50 | -0.001 (-0.004, 0.002)   | 0.70  | -0.1(-0.2, 0.04)      | 0.40  |
| Dialister invisus (sq1316)           | 0.4 (-1.3, 2.1)        | 0.70  | -0.01 (-0.1, 0.02)      | 0.60 | -0.1 (-0.2, 0.04)        | 0.40  | -1.4 (-5.9, 3.1)      | 0.70  |
| Dorea longicatena (sq1408)           | 0.9 (0.1, 1.7)         | 0.10* | 0.003 (-0.01, 0.02)     | 0.80 | 0.1 (0.01, 0.1)          | 0.10* | -1.9 (-3.6, -0.1)     | 0.10* |
| Eisenbergiella tayi (sq768)          | -0.1 (-0.2, 0.1)       | 0.50  | -0.001 (-0.004, 0.002)  | 0.70 | -0.002 (-0.01, 0.01)     | 0.70  | 0.02 (-0.3, 0.3)      | 1.00  |
| Enterococcus faecalis (sq1127)       | -0.05 (-0.7, 0.6)      | 1.00  | -0.01(-0.02, 0.01)      | 0.40 | -0.01(-0.05, 0.03)       | 0.80  | -0.8 (-2.2, 0.6)      | 0.40  |
| Escherichia coli (sq3)               | -0.000 (-0.001, 0.000) | 0.60  | -0.000(-0.000, 0.000)   | 0.60 | -0.000(-0.000, 0.000)    | 0.90  | 0.000 (-0.001, 0.001) | 1.00  |
| Faecalibacterium prausnitzii (sq437) | 0.05 (-0.1, 0.2)       | 0.60  | 0.000(-0.003, 0.003)    | 1.00 | -0.001(-0.01, 0.01)      | 0.80  | -0.1(-0.4, 0.2)       | 0.70  |
| Faecalibacterium prausnitzii (sq649) | 0.1 (-0.1, 0.3)        | 0.50  | 0.002(-0.002, 0.01)     | 0.40 | -0.01(-0.02, 0.01)       | 0.70  | 0.4 (-0.3, 1.1)       | 0.40  |
| Fusobacterium nucleatum (sq1129)     | 0.5 (-0.1, 1.1)        | 0.30  | 0.005(-0.01, 0.02)      | 0.60 | -0.01(-0.1, 0.04)        | 0.90  | 0.4(-1.5, 2.4)        | 0.80  |
| Fusobacterium nucleatum (sq612)      | 0.01 (-0.14, 0.16)     | 0.95  | 0.001(-0.003, 0.004)    | 0.78 | -0.004(-0.01, 0.004)     | 0.42  | -0.11 (-0.43, 0.22)   | 0.60  |
| Granulicatella adiacens (sq421)      | -0.01 (-0.07, 0.05)    | 0.77  | 0.001(-0.001, 0.002)    | 0.44 | -0.002(-0.01, 0.002)     | 0.47  | 0.04(-0.10, 0.18)     | 0.63  |
| Mogibacterium vescum (sq1698)        | -0.56 (-2.64, 1.52)    | 0.67  | -0.01(-0.06, 0.03)      | 0.63 | -0.002(-0.19, 0.18)      | 0.99  | -2.04 (-8.96, 4.88)   | 0.64  |
| Neisseria flavescens (sq647)         | -0.02 (-0.32, 0.27)    | 0.90  | -0.005(-0.01, 0.001)    | 0.19 | -0.01(-0.03, 0.01)       | 0.32  | -0.26(-0.87, 0.36)    | 0.50  |
| Oribacterium parvum (sq1542)         | -0.24 (-1.19, 0.72)    | 0.69  | 0.01 (-0.01, 0.03)      | 0.53 | -0.02(-0.07, 0.04)       | 0.60  | 0.71 (-1.33, 2.75)    | 0.58  |
| Streptococcus parasanguinis (sq93)   | 0.005 (-0.002, 0.01)   | 0.28  | 0.0001 (0.0000, 0.0003) | 0.11 | -0.0004 (-0.001, 0.0005) | 0.49  | -0.003 (-0.04, 0.03)  | 0.89  |

\*p≤0.1; \*\*p≤0.05; \*\*\*p≤0.01. Food intake: Model 1 – univariate regression; Model 2 – multivariable regression. Metabolites: Model 1 – univariate regression; Model 2 – multivariable regression: HOMA-IR\*\*\* R<sup>2</sup> 0.68, Adjusted R<sup>2</sup> 0.63. Gut microbiota: Model 1 – univariate regression. Statistical significance p < 0.05.
